# Supplementary material for: The Histone Methyltransferase Inhibitor A-366 Uncovers a Role for G9a/GLP in the Epigenetics of Leukemia
Source: PubMed Central journal article supplement (PMC4492996; doi:10.1371/journal.pone.0131716), 2015-07-06
Supplement: pone.0131716.s004.pdf [file pone.0131716.s004.pdf]

**S1 Table.**

| <b>5-day proliferation</b> |                           |                           |
|----------------------------|---------------------------|---------------------------|
| <b>Cell line</b>           | <b>A-366</b>              | <b>UNC0638</b>            |
|                            | <b>EC<sub>50</sub> μM</b> | <b>EC<sub>50</sub> μM</b> |
| MOLT-16                    | >10                       | 0.2                       |
| THP-1                      | >10                       | 4.9                       |
| RS4;11                     | >10                       | 3.1                       |
| RPMI8226                   | >10                       | 5.1                       |
| OPM2                       | >10                       | 5.6                       |
| L-363                      | >10                       | 3.9                       |
| KMS12                      | >10                       | 4.4                       |
| KMS11                      | >10                       | 4                         |
| Kasumi-1                   | >10                       | 1.1                       |
| HL-60                      | >10                       | 6.5                       |
| H929                       | >10                       | 4.6                       |
| MV4;11                     | >10                       | 1.7                       |
| K562                       | >10                       | 5.3                       |
| 22RV1                      | >10                       | 0.2                       |
| HT-1080                    | >10                       | 0.5                       |
| Calu6                      | >10                       | 0.5                       |
| DU145                      | >10                       | 0.7                       |
| LN229                      | >10                       | 0.5                       |
| LNCap                      | >10                       | 0.3                       |
| SKBR3                      | >10                       | 0.6                       |
| H1975                      | >10                       | >10                       |
| H2009                      | >10                       | 3.9                       |
| Calu-1                     | >10                       | 1.3                       |
| Calu-6                     | >10                       | 1.5                       |
| H358                       | >10                       | 4.3                       |
| H441                       | >10                       | 8.7                       |
| H522                       | >10                       | 1.5                       |
| H661                       | >10                       | 4.9                       |
|                            |                           |                           |
|                            |                           |                           |
| <b>7-day proliferation</b> |                           |                           |
| <b>Cell line</b>           | <b>A-366</b>              | <b>UNC0638</b>            |
|                            | <b>EC<sub>50</sub> μM</b> | <b>EC<sub>50</sub> μM</b> |
| MHH-65-1                   | >10                       | 1.9                       |
| CAPO-ES1                   | >10                       | 1.2                       |
| PA-1                       | >10                       | 0.2                       |
| SK-N-MC                    | >10                       | 0.2                       |
| G-401                      | >10                       | 0.4                       |
| ZR7350                     | >10                       | 1.2                       |
| U2OS                       | >10                       | 0.5                       |
| DaoY                       | >10                       | 0.1                       |
| PH-1                       | >10                       | 4.4                       |
| TC-71                      | >10                       | 0.6                       |

| <b>12-day proliferation</b> |                           |                           |
|-----------------------------|---------------------------|---------------------------|
| <b>Cell line</b>            | <b>A-366</b>              | <b>UNC0638</b>            |
|                             | <b>EC<sub>50</sub> μM</b> | <b>EC<sub>50</sub> μM</b> |
| IMR-32                      | >10                       | 0.1                       |
| A-201                       | >10                       | 0.6                       |
